# Supplementary material for: Prediction of stable silver selenide-based energy materials sustained by rubidium selenide alloying
Source: Royal Society of Chemistry journal article supplement (doi:10.1039/d2nj04421h), 2022-01-01
Supplement: d2nj04421h1.pdf [file d2nj04421h1.pdf]

## Supporting Information

### Prediction of stable silver selenide-based energy materials sustained by rubidium selenide alloying

Yee Hui Robin Chang <sup>a,\*</sup>, Junke Jiang <sup>b</sup>, Keat Hoe Yeoh <sup>c,d,\*</sup>, Moi Hua Tuh <sup>e</sup>, Fei Ha Chiew <sup>f</sup>

<sup>a</sup> Faculty of Applied Sciences, Universiti Teknologi MARA, Cawangan Sarawak, 94300 Kota Samarahan, Sarawak, Malaysia

<sup>b</sup> Univ Rennes, ENSCR, CNRS, ISCR-UMR 6226, F-35000 Rennes, France

<sup>c</sup> Department of Electrical and Electronic Engineering, Lee Kong Chian Faculty of Engineering and Science, Universiti Tunku Abdul Rahman, 43000 Kajang, Selangor, Malaysia

<sup>d</sup> Center for Photonics and Advanced Material Research, Lee Kong Chian Faculty of Engineering and Science, Universiti Tunku Abdul Rahman, 43000 Kajang, Selangor, Malaysia

<sup>e</sup> Faculty of Computer & Mathematical Sciences, Universiti Teknologi MARA, Cawangan Sarawak, 94300 Kota Samarahan, Sarawak, Malaysia

<sup>f</sup> School of Civil Engineering, College of Engineering, Universiti Teknologi MARA, Cawangan Sarawak, 94300 Kota Samarahan, Sarawak, Malaysia

\* Electronic mail: robincyh@uitm.edu.my; keathoe.yeoh@gmail.com

**S1** Crystallographic data and space group (SG) for Rb<sub>2</sub>Se-Ag<sub>2</sub>Se phases. Red, blue and green spheres represent Rb, Ag and Se atoms, respectively.

| Space group                                                                                        | Unit cell                                                                           | Lattice constants / Å                      | Atomic Wyckoff positions                                                                                          |
|----------------------------------------------------------------------------------------------------|-------------------------------------------------------------------------------------|--------------------------------------------|-------------------------------------------------------------------------------------------------------------------|
| Bulk<br>Rb <sub>6</sub> Ag <sub>2</sub> Se <sub>4</sub><br><i>R</i> $\bar{3}$ <i>c</i><br>(SG 167) | 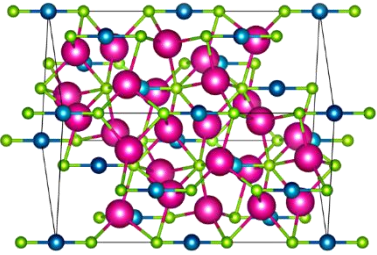 | $a = 9.409$<br>$c = 19.126$                | Rb1 18e (0.28270, 0.00000, 0.25000)<br>Ag1 6b (0.00000, 0.00000, 0.00000)<br>Se1 12c (0.00000, 0.00000, -0.37077) |
| Bulk<br>Rb <sub>2</sub> Ag <sub>2</sub> Se <sub>2</sub><br><i>Cmcm</i><br>(SG 63)                  |  | $a = 6.653$<br>$b = 12.802$<br>$c = 6.266$ | Rb1 4c (0.00000, 0.22767, 0.25000)<br>Ag1 4b (0.00000, 0.50000, 0.00000)<br>Se1 4c (0.00000, -0.34886, 0.25000)   |

|                                                                                                                    |                                                                                     |                                                                                                                           |                                                                                                                                                                                                                                                                                                                                                                                                                                                                                                         |
|--------------------------------------------------------------------------------------------------------------------|-------------------------------------------------------------------------------------|---------------------------------------------------------------------------------------------------------------------------|---------------------------------------------------------------------------------------------------------------------------------------------------------------------------------------------------------------------------------------------------------------------------------------------------------------------------------------------------------------------------------------------------------------------------------------------------------------------------------------------------------|
| <p>Bulk<br/>Rb<sub>2</sub>Ag<sub>6</sub>Se<sub>4</sub><br/>P1<br/>(SG 1)</p>                                       | 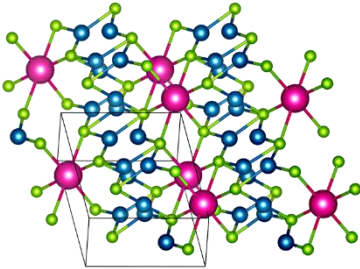   | <p><math>a = 8.887</math><br/><math>b = 8.481</math><br/><math>c = 5.473</math></p>                                       | <p>Rb1 1a (-0.00191, 0.17494, -0.08372)<br/>Rb2 1a (0.00281, -0.32311, 0.40799)<br/>Ag1 1a (0.41240, -0.03285, -0.46218)<br/>Ag2 1a (0.49613, 0.16157, -0.07138)<br/>Ag3 1a (-0.38305, -0.13610, -0.19985)<br/>Ag4 1a (-0.43488, 0.34633, 0.33661)<br/>Ag5 1a (0.40166, 0.47962, 0.02478)<br/>Ag6 1a (0.49788, -0.33740, 0.42362)<br/>Se1 1a (0.24382, 0.13063, 0.32368)<br/>Se2 1a (0.23545, -0.37551, -0.18996)<br/>Se3 1a (-0.24970, 0.20336, -0.47508)<br/>Se4 1a (-0.24668, -0.30765, 0.03254)</p> |
| <p>Bulk<br/>Rb<sub>2</sub>Se<br/><i>Fm</i><math>\bar{3}</math><i>m</i><br/>(SG 225)</p>                            |    | <p><math>a = 8.098</math></p>                                                                                             | <p>Rb1 8c (0.25000, 0.25000, 0.25000)<br/>Se1 4a (0.00000, 0.00000, 0.00000)</p>                                                                                                                                                                                                                                                                                                                                                                                                                        |
| <p>Bulk<br/>Ag<sub>8</sub>Se<sub>4</sub><br/><i>P</i>2<sub>1</sub>2<sub>1</sub>2<sub>1</sub><br/>(SG 19)</p>       |   | <p><math>a = 7.358</math><br/><math>b = 7.024</math><br/><math>c = 4.645</math></p>                                       | <p>Ag1 4a (-0.38258, -0.02138, -0.25905)<br/>Ag2 4a (-0.29060, -0.36886, 0.07677)<br/>Se1 4a (0.08355, 0.24681, -0.13060)</p>                                                                                                                                                                                                                                                                                                                                                                           |
| <p>2D<br/>Rb<sub>2</sub>Ag<sub>2</sub>Se<sub>2</sub><br/><i>P</i>2<sub>1</sub><math>\bar{m}</math><br/>(SG 11)</p> |  | <p><math>a = 5.036</math><br/><math>b = 5.478</math><br/><math>c = 19.490</math><br/><math>\beta = 91.87^\circ</math></p> | <p>Rb1 2e (-0.48738, 0.25000, -0.37995)<br/>Ag1 2c (0.00000, 0.00000, 0.50000)<br/>Se1 2e (-0.01578, 0.25000, 0.39193)</p>                                                                                                                                                                                                                                                                                                                                                                              |

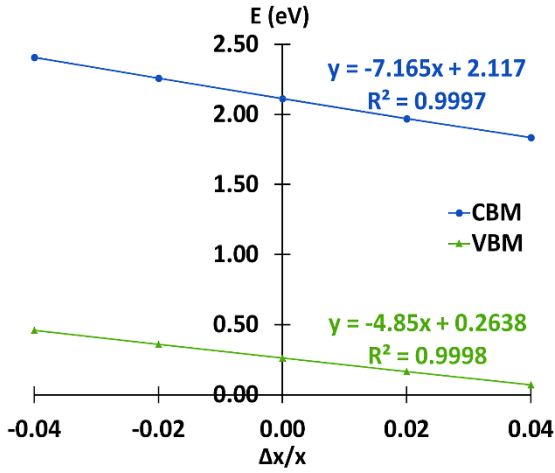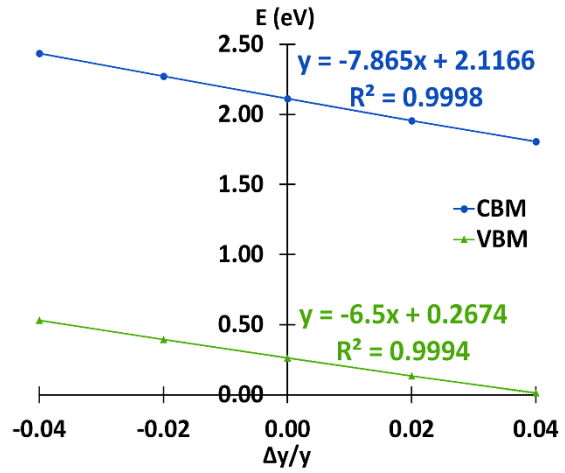

(a)

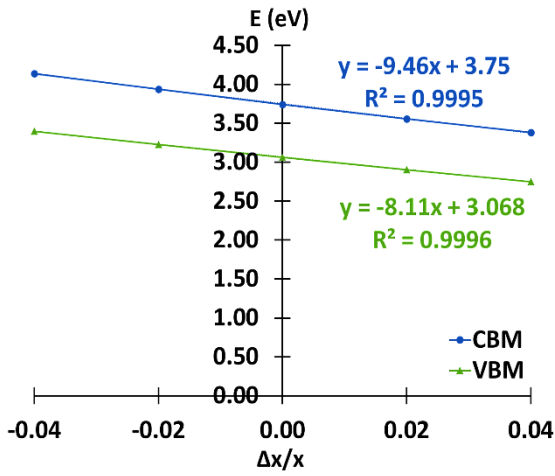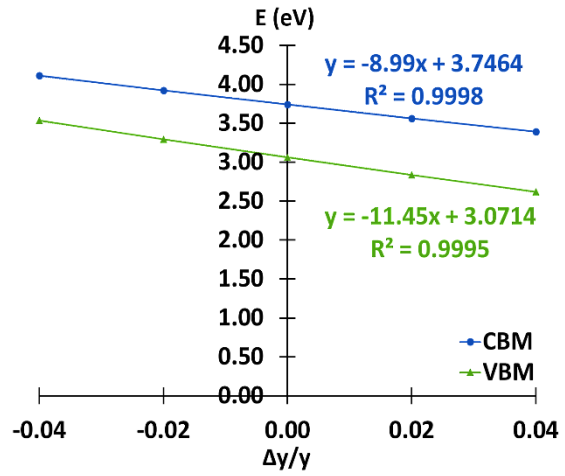

(b)

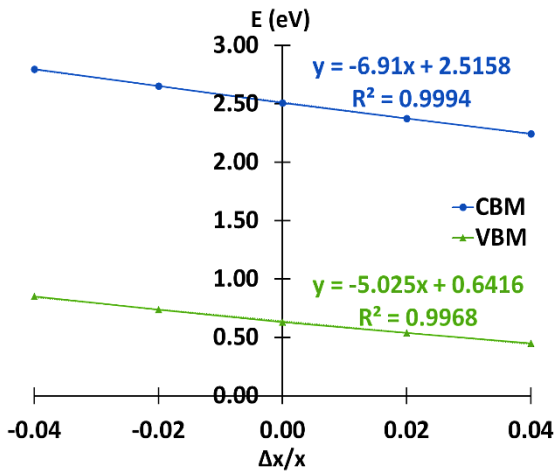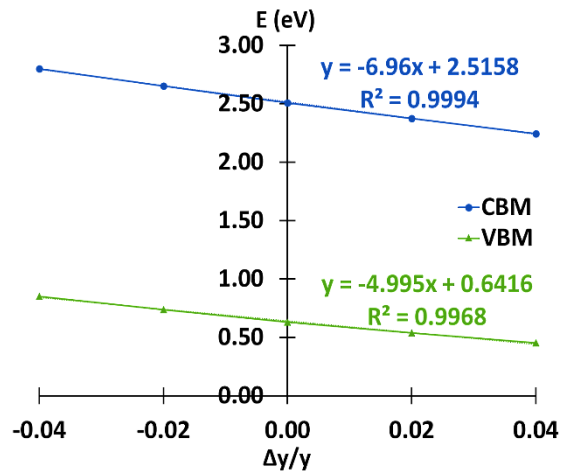

(c)

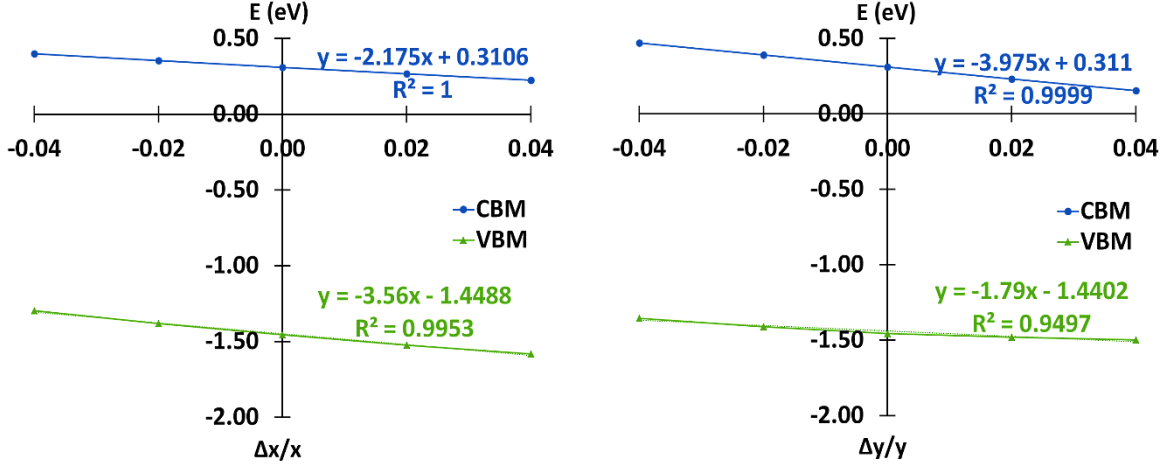

(d)

**S2** Band energies of the CBM and VBM for bulk (a)  $\text{Rb}_2\text{Ag}_2\text{Se}_2$ , (b)  $\text{Rb}_2\text{Ag}_6\text{Se}_4$ , (c)  $\text{Rb}_6\text{Ag}_2\text{Se}_4$  and (d) monolayer  $\text{Rb}_2\text{Ag}_2\text{Se}_2$  phases as a function of lattice dilation along  $x$  and  $y$  directions. The fitted slopes show the  $E_D$  in eV.

**S3** Elastic properties, Debye temperature, sound velocities and Gruneisen parameter

Based on the Voigt-Reuss-Hill approximation [1], elastic moduli such as shear modulus  $G$  (GPa), bulk modulus  $B$  (GPa), Young's modulus  $E$  (GPa) and Poisson's ratio  $\nu$  were calculated. Relevant equations for these computations are stated as follows.

$$B = \frac{1}{2}(B_{\text{Voigt}} + B_{\text{Reuss}}) \quad (1)$$

$$G = \frac{1}{2}(G_{\text{Voigt}} + G_{\text{Reuss}}) \quad (2)$$

in which  $B$  and  $G$  are the mean of Voigt [2] and Reuss [3] approximations.

$$E = \frac{9BG}{3B + G} \quad (3)$$

$$\nu = \frac{3B - 2G}{6B + 2G} \quad (4)$$

Another crucial parameter which has a strong influence on the physical properties of the solid is the Debye temperature  $\Theta_D$ , calculated by means of the sound velocity [4], as follows:

$$\Theta_D = \frac{h}{k_B} \left[ \frac{3n}{4\pi} \left( \frac{N_A \rho}{M} \right) \right] v_m \quad (5)$$

where  $k_B$ ,  $h$ ,  $N_A$ ,  $\rho$ ,  $M$  and  $n$  are the Boltzmann's constant, Planck's constant, Avogadro's constant, density, molecular weight and number of atoms per unit cell, respectively. The longitudinal sound velocity, transverse sound velocity and mean sound velocity are represented by  $v_l$ ,  $v_t$  and  $v_m$ , respectively.  $v_m$  is quantifiable by  $v_l$  and  $v_t$  [4] using the following:

$$v_l = \left[ \frac{(B + 4/3 G)}{\rho} \right]^{\frac{1}{2}} \quad (6)$$

$$v_t = \left( \frac{G}{\rho} \right)^{\frac{1}{2}} \quad (7)$$

$$v_m = \left[ \frac{1}{3} \left( \frac{2}{v_t^3} + \frac{1}{v_l^3} \right) \right]^{-\frac{1}{3}} \quad (8)$$

Finally, these velocities can also be applied onto the formulation below to determine the Gruneisen parameter  $\gamma$ .

$$\gamma = \frac{9(v_l^2 - 4/3 v_t^2)}{2(v_l^2 + 2v_t^2)} \quad (9)$$

[1] R. Hill (1952). The elastic behavior of a crystalline aggregate. Proc. Phys. Soc. A, 65, 349-354.

[2] W. Voigt (1928). Lehrbuch der Kristallohysic Teubner, Leipzig, Germany.

[3] A. Reuss (1929). Berechnung der Fließgrenze von Mischkristallen auf Grund der Plastizitätsbedingung für Einkristalle. Z. Angew. Math. Mech., 9, 49-58.

[4] O.L. Anderson (1963). A Simplified Method For Calculating The Debye Temperature From Elastic Constants. J. Phys. Chem. Solids, 24, 909-917.

#### S4 Surface calculations for 2D Rb<sub>2</sub>Ag<sub>2</sub>Se<sub>2</sub>

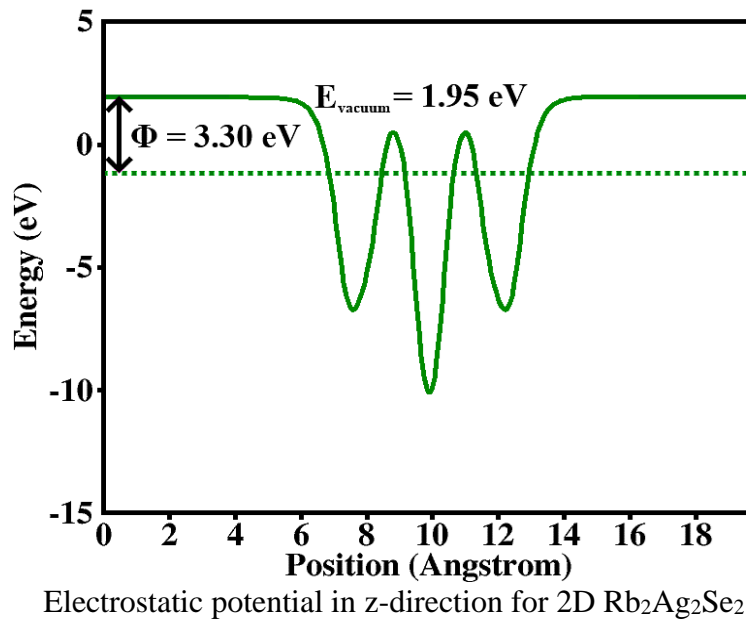

#### S5 Detailed operation of scissor factor

For dielectric function calculations using VASP, the scissor shift value was added to the “SCISSOR” tag, following the method described in

[https://www.vasp.at/wiki/index.php/Improving\\_the\\_dielectric\\_function#Model-BSE](https://www.vasp.at/wiki/index.php/Improving_the_dielectric_function#Model-BSE)

while for transport calculations, it was set in one of the BoltzTraP input file lines (0 0 0 0.0 # iskip idebug setgap shiftgap), under the “shiftgap” tag.
